# Supplementary material
Source: PubMed Central journal article supplement (PMC6176180)
Supplement: ajcr0008-1873-f3.pdf [file ajcr0008-1873-f3.pdf]

## Plasma PIK3CA ctDNA detection in advanced breast cancer by NGS

**Table S1.** The analysis of clinical factors including age, tumor stage, tumor size, nodal status, ER, HER2, ki67 and *PIK3CA* p.H1047R mutants

|                            | Diagnosed age | Age group by 50 | Age group by 45 | ER status | ki67 status | Tumor grade | Node positive and negative | p.H1047R |
|----------------------------|---------------|-----------------|-----------------|-----------|-------------|-------------|----------------------------|----------|
| Diagnosed age              | 1.000         |                 |                 |           |             |             |                            |          |
| Group of age by 50         | .845**        | 1.000           |                 |           |             |             |                            |          |
|                            | .000          |                 |                 |           |             |             |                            |          |
| Age group by 45            | .857**        | .687**          | 1.000           |           |             |             |                            |          |
|                            | .000          | .000            |                 |           |             |             |                            |          |
| ER status                  | -.217         | -.280*          | -.167           | 1.000     |             |             |                            |          |
|                            |               | .040            |                 |           |             |             |                            |          |
| ki67 status                | -.210         | -.240           | -.372**         | .123      | 1.000       |             |                            |          |
|                            |               |                 | .006            |           |             |             |                            |          |
| Grade 3 class              | -.103         | -.106           | -.164           | -.283*    | -.129       | 1.000       |                            |          |
|                            |               |                 |                 | .038      |             |             |                            |          |
| Grade after surgery        | .049          | .097            | -.074           | -.196     | .394**      | .258        |                            |          |
|                            |               |                 |                 |           | .003        |             |                            |          |
| Node positive and negative | .195          | .240            | .302*           | -.139     | -.301*      | .109        | 1.000                      |          |
|                            |               |                 | .026            |           | .027        |             |                            |          |
| mt314054                   | .148          | .351**          | .157            | -.103     | .022        | -.237       | .006                       | 1.000    |
|                            |               | .009            |                 |           |             |             |                            |          |

\*\*significant at 0.01 significance level (double-tail). \*significant at 0.05 significance level (double-tail).
